# Supplementary material for: Mesoporous CoO/Co–N–C nanofibers as efficient cathode catalysts for Li–O2 batteries
Source: Royal Society of Chemistry journal article supplement (doi:10.1039/c8ta07185c), 2018-01-01
Supplement: c8ta07185c1.pdf [file c8ta07185c1.pdf]

## Supporting information

### **Mesoporous CoO/Co-N-C Nanofibers as Efficient Cathode Catalysts for Li-O<sub>2</sub> Batteries.**

Biao He<sup>‡a</sup>, Jun Wang<sup>‡a</sup>, Yuqi Fan<sup>b</sup>, Yuliang Jiang<sup>a</sup>, Yanjie Zhai<sup>a</sup>, Yu Wang<sup>a</sup>, Qishun Huang<sup>a</sup>, Ning Wang<sup>c</sup>, Feng Dang<sup>\*a</sup> and Zidong Zhang<sup>\*a</sup>

a. Key Laboratory for Liquid-Solid Structural Evolution and Processing of Materials (Ministry of Education), Shandong University, Jinan 250061, China.

b. Institute of Environment and Ecology, Shandong Normal University, Jinan 250014, China.

c. State Key Laboratory of Marine Resource Utilization in South China Sea, Hainan University, Haikou 570228, China

‡ These authors contributed to this work equally.

E-mail: dangfeng@sdu.edu.cn

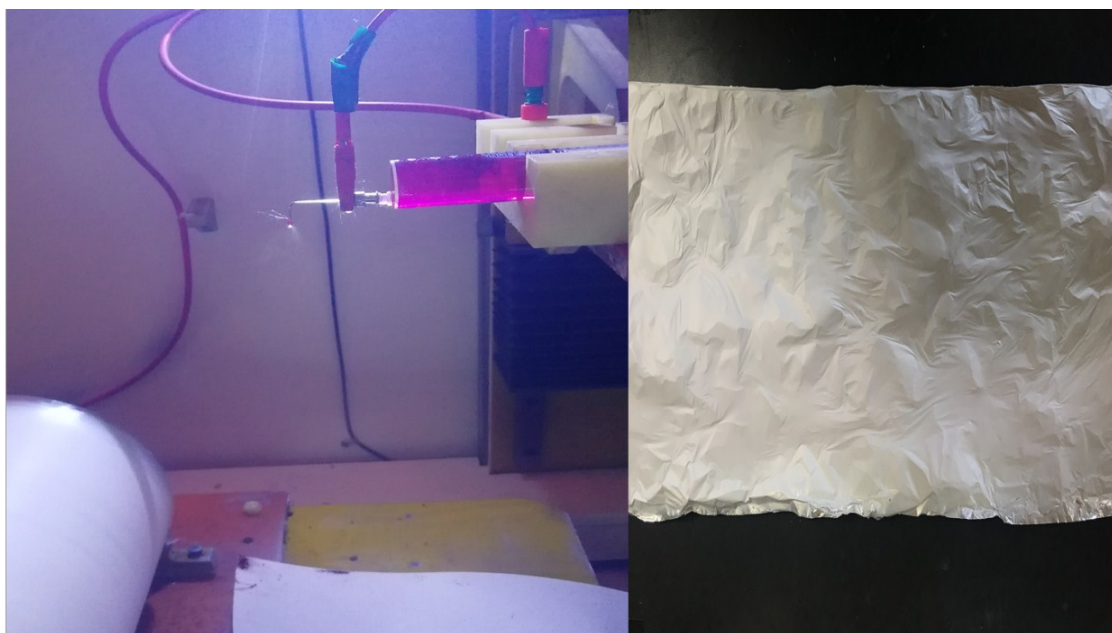

**Fig. S1** Photo of the electrospinning process to fabricate the nanofibers with collected  $\text{Co}(\text{NO}_3)_2/\text{PVP}$  mat on Al foil.

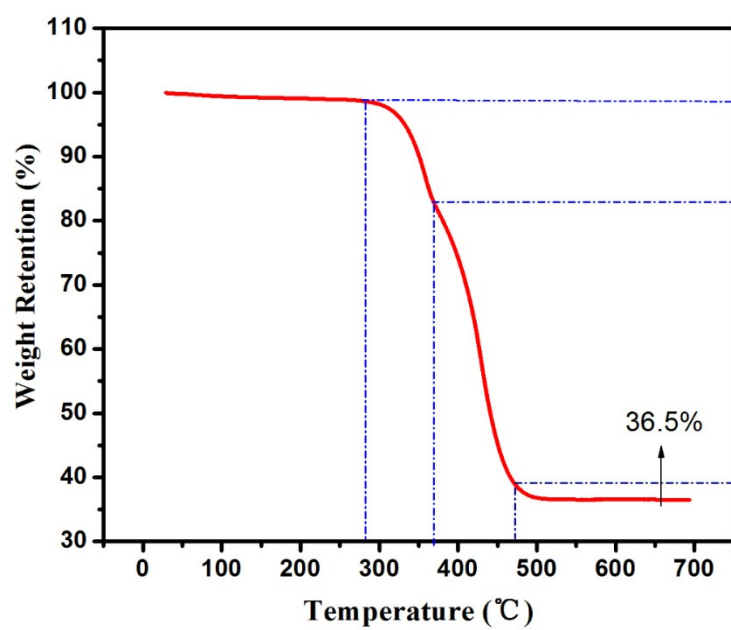

**Fig. S2** TG survey of CoO/Co-N-C-2 under air.

**Table S1.** Schematic illustration of weight ratio calculated from TGA results of CoO/Co-N-C-2.

| Adding weight                                              | Terminal weight ratio                             | Remain in the sample           |
|------------------------------------------------------------|---------------------------------------------------|--------------------------------|
| Co(NO <sub>3</sub> ) <sub>2</sub> ·6H <sub>2</sub> O 0.15g | Co <sub>3</sub> O <sub>4</sub> 36.5%;<br>Co 26.8% | Co<br>0.03036g 100%            |
| PVP 0.4g                                                   | Else 73.2%                                        | N+O+C (PVP) 0.08296g<br>20.75% |

The CoO/Co-N-C fibers transform into Co<sub>3</sub>O<sub>4</sub> after TGA measurements in air. Assuming that the Co elements remain in the sample through the process, the weight ratio of Co is calculated to be 26.8% from the final products weight ratio (36.5%).

**Table S2.** Weight ratio of CoO: Co for different Co(NO<sub>3</sub>)<sub>2</sub>·6H<sub>2</sub>O contented samples

| Sample       | Co(NO <sub>3</sub> ) <sub>2</sub> ·6H <sub>2</sub> O/g | CoO: Co |
|--------------|--------------------------------------------------------|---------|
| CoO/Co-N-C-1 | 0.1                                                    | 28: 72  |
| CoO/Co-N-C-2 | 0.15                                                   | 45: 55  |
| CoO/Co-N-C-3 | 0.2                                                    | 36: 64  |

We use the RIR method based on the XRD results to calculate the mass ratio of Co/CoO

$$w_x = \frac{I_{xi}}{K_A^x \sum_{i=A}^N \frac{I_i}{K_A^i}}$$

according to the previous reports<sup>1</sup> and the formula:

The “x” represent one of the “N” phases, “K” is calculated from the RIR values (6.16 for CoO, 10.15 for Co) if one of the phases is defined as internal standard, and “I” represent the intensity result from the XRD survey. By applying this calculation method, it is found that the mass ratios of CoO/Co can be adjusted with changing the adding amounts of Co(NO<sub>3</sub>)<sub>2</sub> • 6H<sub>2</sub>O in the synthesis.

1. P. Zhang, R. Wang, M. He, J. Lang, S. Xu and X. Yan, *Adv. Funct. Mater.*, 2016, 26, 1354-1364.

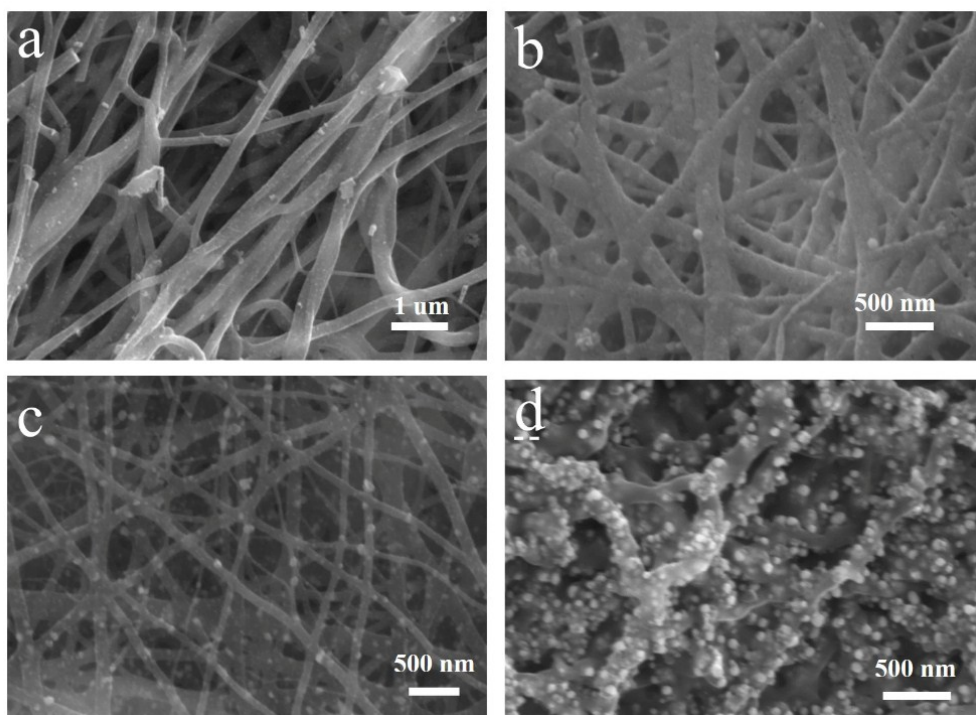

**Fig. S3** SEM image of a) N-C; b) CoO/Co-N-C-1; c) CoO/Co-N-C-2; d) CoO/Co-N-C-3.

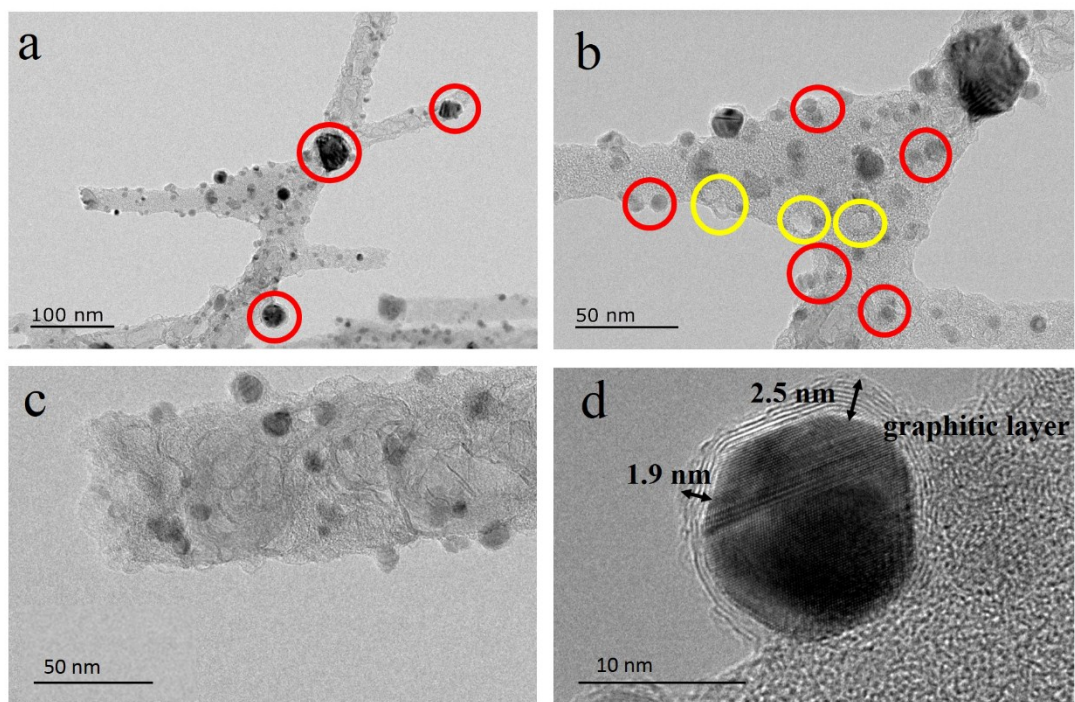

**Fig. S4** TEM images of CoO/Co-N-C-2 nanofibers.

The pores are marked by yellow circles, and the CoO/Co particles are marked by red circles. While the small particle covered with graphitic layer is measured to be around 2 nm.

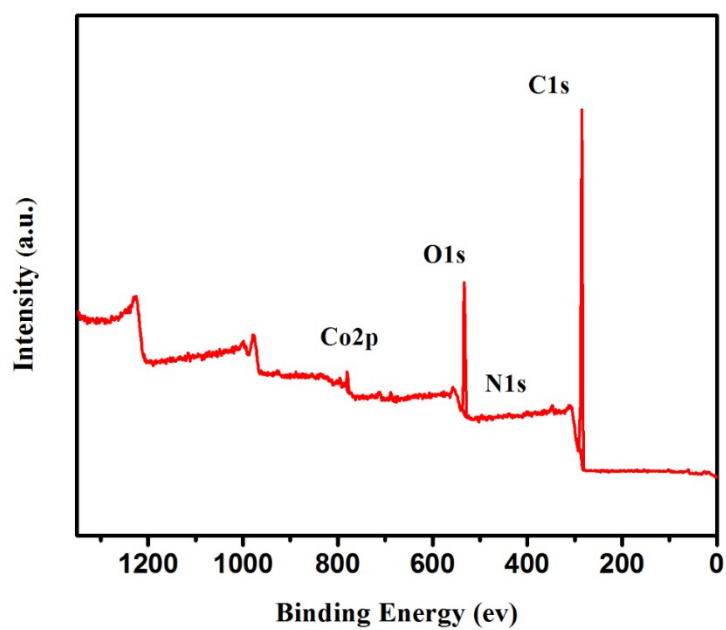

**Fig. S5** XPS survey spectra of CoO/Co-N-C, and the content of C, N, O and Co elements are C 85.38 at%, N 0.82 at%, O 13.51at%, and Co 0.29 at%, respectively.

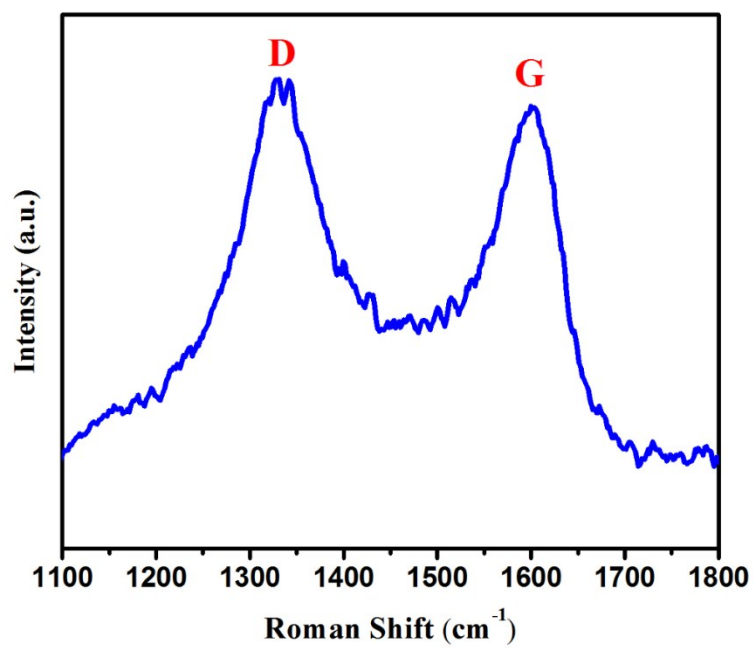

**Fig. S6** Raman spectra of CoO/Co-N-C-2 with the corresponding intensity ratio of D and G bands ( $I_D/I_G=1.094$ ).

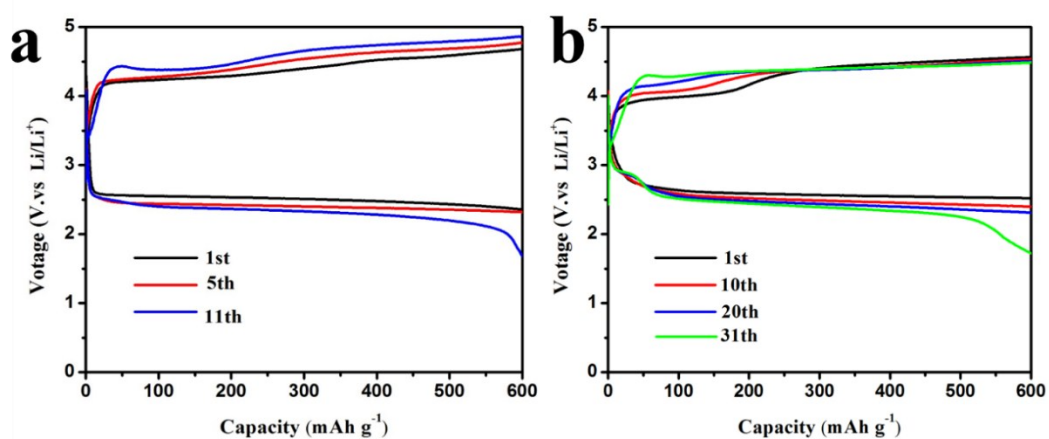

**Fig. S7** The cycle performance of a) Super P carbon and b) N-C cathode at a current density of 100 mA g<sup>-1</sup> with a specific capacity limit of 600mAh g<sup>-1</sup>.

It is evident that N-C cathode shows a better cycle performance and a lower charge potential than those of Super P carbon electrode, mainly attributed to the N/O dual-doping nanofiber structure. However, when adding applicable amount of Co, the remarkable performance of the cathode catalyst can be achieved.

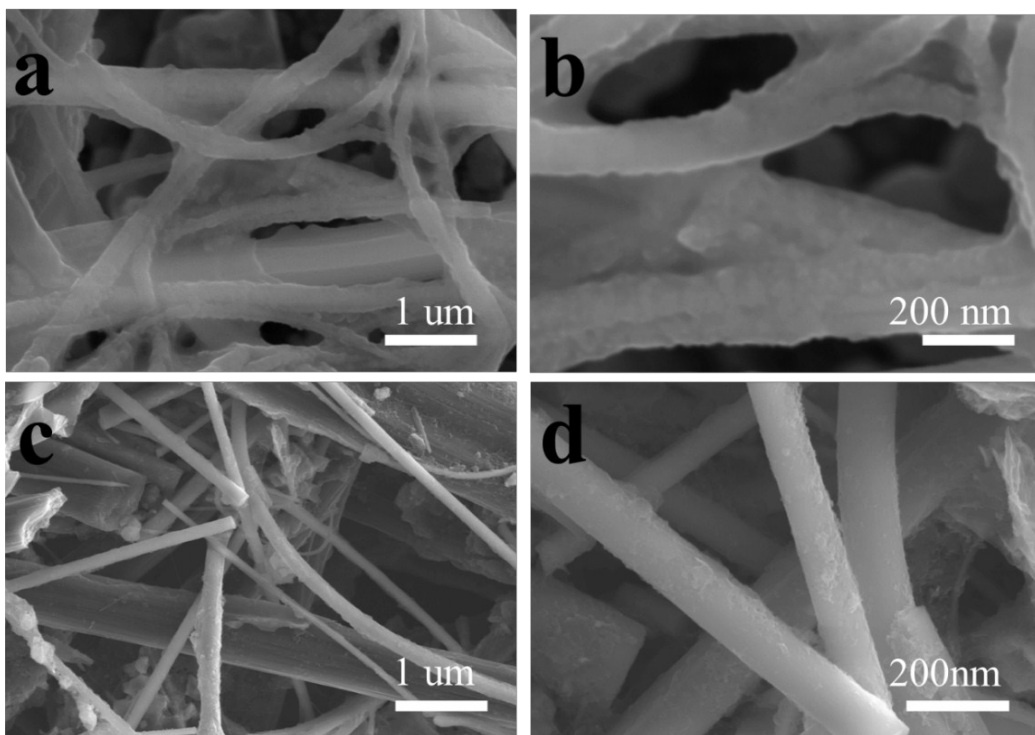

**Fig. S8** SEM images of CoO/Co-N-C-2 cathodes at different stages a) and b) after 140th discharged; c) and d) after 140th charged.

The vast majority of discharge products can still be recycled leaving a smooth fiber surface. It is no doubt that the CoO/Co-N-C-2 electrode can still handle more discharge/charge cycles, and it possesses a great durability and cycle ability.

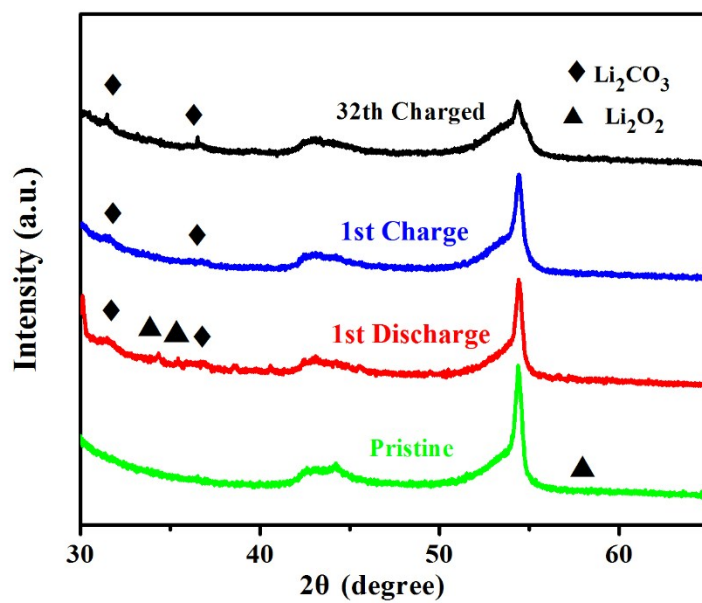

**Fig. S9** XRD patterns of N-C cathode at different stages.

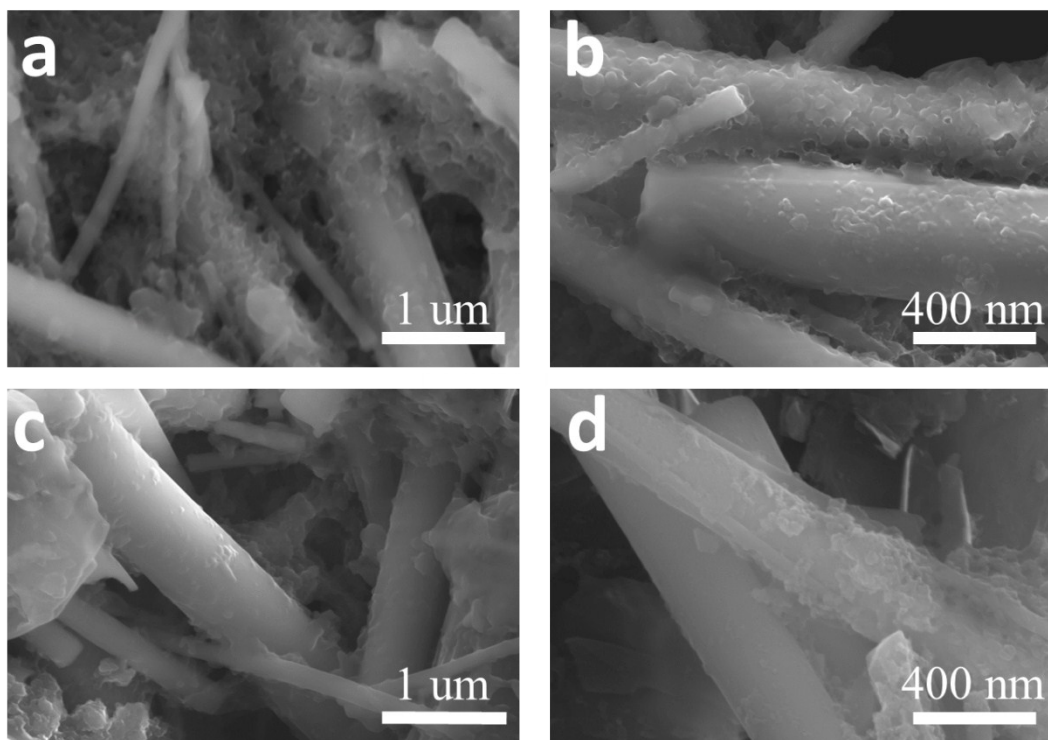

**Fig. S10** SEM images of N-C cathode at different stages under a current of  $100 \text{ mAh g}^{-1}$ : a) and b) after 1st discharged; c) and d) after 1st charged.

After discharging, the products accumulated on the fibers surface. However, the surface cannot recover to the smooth appearance. Therefore, with the increasing of by-products, the active sites are encased, leading to a limited cycle performance.

**Table S3.** Electrochemical performance comparison of CoO/Co-N-C catalysts with those of representative carbon based CoO and/or Co decorated materials reported in the literature.

| Ref. No. | Materials                       | Electrolyte                                     | Current Density (mA g <sup>-1</sup> ) | Specific Capacity (mAh g <sup>-1</sup> ) | Cycles/Fixed Capacity (mAh g <sup>-1</sup> ) |
|----------|---------------------------------|-------------------------------------------------|---------------------------------------|------------------------------------------|----------------------------------------------|
| Our work | CoO/Co-N-C-2                    | 1 M LiCF <sub>3</sub> SO <sub>3</sub> in TEGDM  | 100                                   | 8798.6                                   | 140/600<br>94/1000                           |
| 1        | Co/CoO@PCNS                     | 0.1 M LiClO <sub>4</sub> in DMSO                | 100                                   | 2660                                     | 55/800                                       |
| 2        | Co/CoO@NGNS                     | 1 M LiCF <sub>3</sub> SO <sub>3</sub> in TEGDME | 100                                   | 7800                                     | 70/500                                       |
| 3        | Carbon-dotted defective CoO     | 1 M LiTFSI in TEGDME                            | 100                                   | 7011                                     | 50/1000<br>(200 mAh g <sup>-1</sup> )        |
| 4        | Co@PNCf                         | 1 M LiTFSI in TEGDME                            | 100                                   | 4583                                     | 40/500                                       |
| 5        | Co@NGNS                         | 1 M LiCF <sub>3</sub> SO <sub>3</sub> in TEGDME | 100                                   | 3630                                     | 30/1000                                      |
| 6        | Oxygen vacancy bearing CoO      | 1 M LiTFSI in TEGDME                            | 200                                   | 4623                                     | 25/1000                                      |
| 7        | CNT@Ni@NiCo silicate core-shell | 1 M LiCF <sub>3</sub> SO <sub>3</sub> in TEGDME | 200                                   | 10046                                    | 50/1000                                      |
| 8        | CoO/CNF                         | 1 M LiTFSI in TEGDME                            | 80                                    | 3882.5                                   | 50/1000                                      |
| 9        | Co-CNF                          | 0.1 M LiClO <sub>4</sub> DMSO/TEGDME            | 100                                   | -                                        | 70/500                                       |
| 10       | Co@N-C                          | 1 M LiTFSI in TEGDME                            | 0.1 mA cm <sup>-2</sup>               | 3862                                     | 40/500                                       |
| 11       | CoO nanowire array              | 1 M LiTFSI in TEGDME                            | 100                                   | 4888                                     | 50/500                                       |

1. W.P. Ni, S.M. Liu, Y.Q. Fei, Y. He, X.Y. Ma, L.J. Lu and Y.Q. Deng, *J. Mater. Chem. A*, 2016, 4, 7746-7753;

2. P. Zhang, R.T. Wang, M. He, J.W. Lang, S. Xu and X.B. Yan, *Adv. Funct. Mater.*, 2016, 26, 1354-1364.
3. R. Gao, Z.Y. Li, X.L. Zhang, J.C. Zhang, Z.B. Hu and X.F. Liu, *ACS Catal.*, 2015, 6(1): 400-406.
4. Y. Cao, H. Lu, Q.S. Hong, J.J. Bai, J.W. Wang and X.D. Li, *J. Power Sources*, 2017, 368: 78-87.
5. G.Q. Tan, L. Chong, R. Amine, J. Lu, C. Liu, Y.F. Yuan, J.G. Wen, K. He, X.X. Bi, Y.Y. Guo, H. H. Wang, R. Shahbazian-Yassar, S. Al Hallaj, D. J. Miller, D.J. Liu and K. Amine, *Nano Lett.*, 2017, 17, 2959-2966.
6. R. Gao, L. Liu, Z.B. Hu, P. Zhang, X.Z. Cao, B.Y. Wang and X.F. Liu, *J. Mater. Chem. A*, 2015, 3, 17598-17605.
7. Z.W. Li, J.H. Yang, D. A. Agyeman and M. Park, W. Tamakloe, Y. Yamauchi and Y. M. Kang, *J. Mater. Chem. A*, 2018, 6, 10447-10455.
8. B.W. Huang, L. Li, Y.J. He, X.Z. Liao, Y.S. He, W Zhang and Z.F. Ma, *Electrochimica Acta*, 2014, 137, 183-189.
9. Y.J Kim, H. Lee, D.J. Lee, J.K. Park and H.T. Kim, *ChemSusChem*, 2015, 8, 2496-2502.
10. J.X. Song, X.J. Lv, Y.F. Jiao, P. Wang, M. Xu, T.W. Li, X.B. Chen, J.M. Li and Z.A. Zhang, *J. Power Sources*, 2018, 394, 122-130.
11. B.S. Wu, H.Z. Zhang, W. Zhou, M.R. Wang, X.F. Li and H.M. Zhang, *ACS Appl. Mater. Interfaces*, 2015, 7, 23182-23189.
